# Supplementary material
Source: Research Square preprint supplement (doi:10.21203/rs.3.rs-8924648/v1)
Supplement: Supplementary file 1 [file 7b50752ac8e5b00da95dfd10.docx]

**Supporting Information**

**PRMT3-mediated arginine methylation of YBX1 promotes tumorigenesis in glioblastoma**


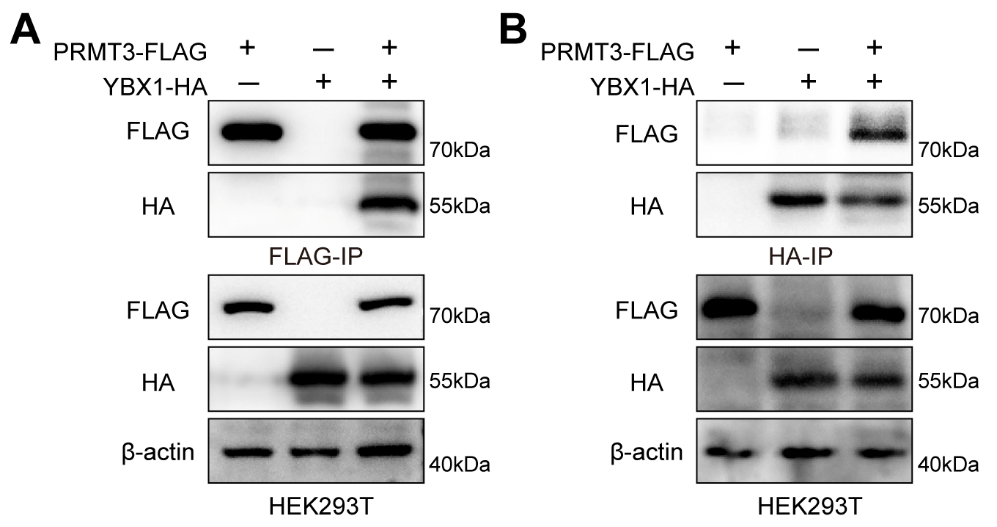


**Fig. S1 PRMT3 interacts with YBX1. A**, **B** Co-IP assays in HEK293T cells co-transfected with RMT3-FLAG and YBX1-HA plasmids. Lysates were immunoprecipitated with anti-FLAG (**A**) or anti-HA (**B**) beads and analyzed by immunoblotting.


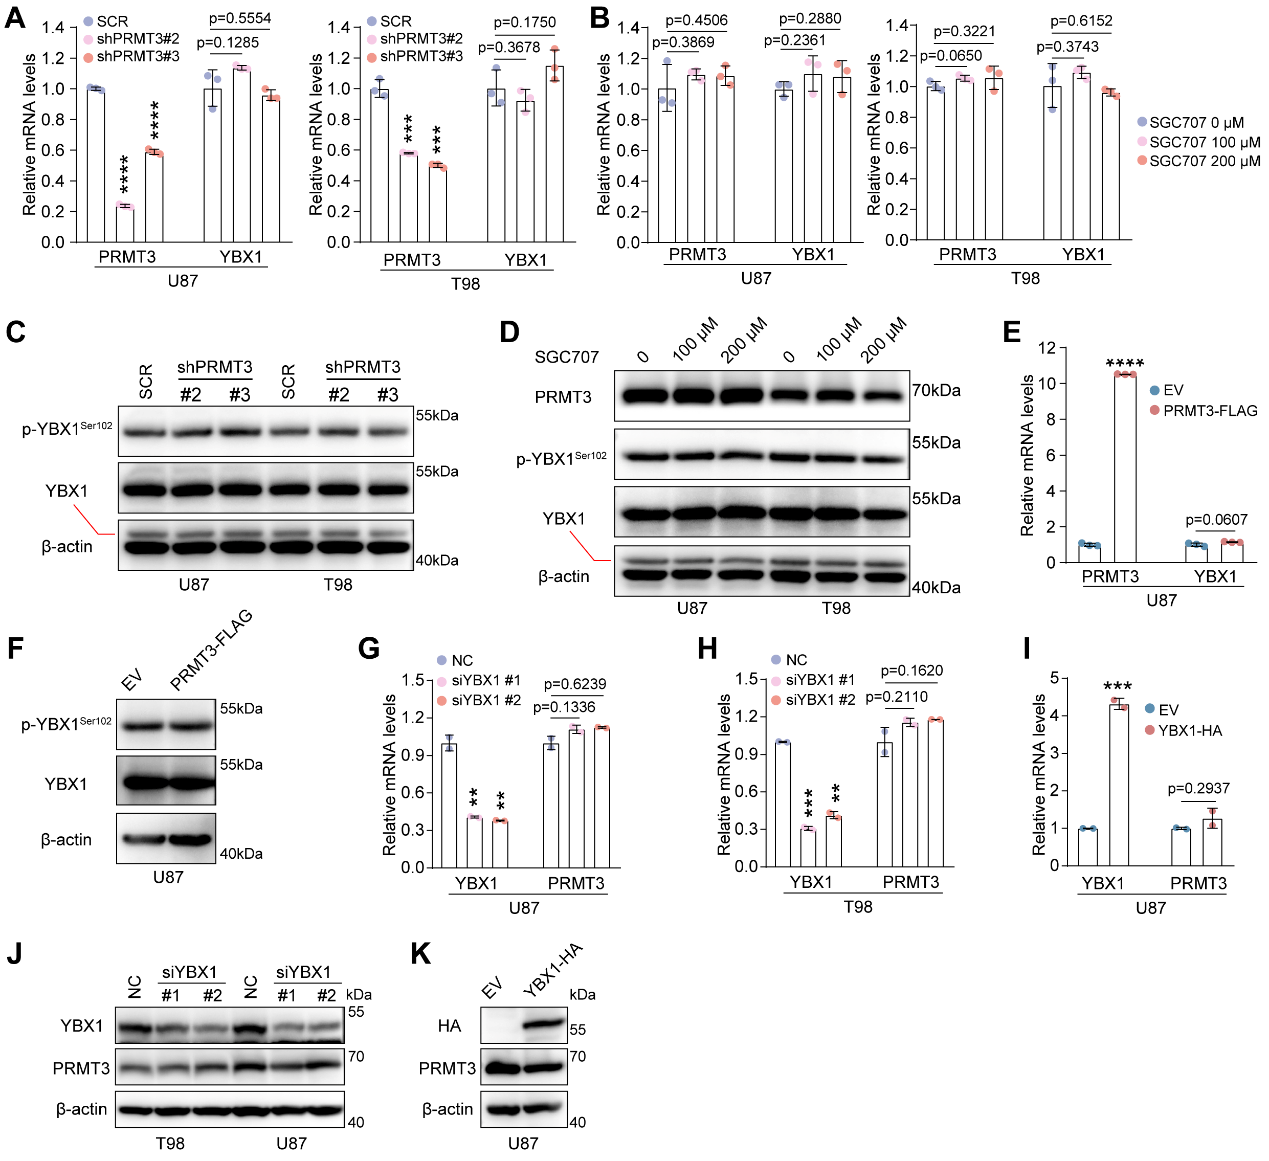


**Fig. S2 PRMT3 regulates YBX1 via post-translational modification rather than transcriptional control. A**, **B** PRMT3 and YBX1 mRNA levels were assessed by RT-qPCR in U87 and T98 cells following PRMT3 knockdown (**A**) or treatment with the PRMT3 inhibitor SGC707 (**B**). **C**, **D** Western blot analysis of total YBX1 and p-YBX1 (Ser102) protein levels in U87 and T98 cells with PRMT3 knockdown (**C**) or SGC707 treatment (**D**). **E**, **F** PRMT3 and YBX1 mRNA levels (**E**) and protein levels of p-YBX1 (Ser102) and total YBX1 (**F**) were measured in U87 cells overexpressing PRMT3. **G-I** RT‑qPCR analysis of YBX1 and PRMT3 mRNA levels in U87 (**G**) and T98 (**H**) cells following YBX1 knockdown, and in U87 cells upon YBX1 overexpression (**I**). **J**, **K** Western blotting analysis of YBX1 and PRMT3 protein levels in U87 and T98 cells with YBX1 knockdown (**J**) and in U87 cells overexpressing YBX1 (**K**). Data are presented as mean ± SD. ****P* < 0.001, ****P* < 0.0001, versus the indicated groups, Student’s t-test.


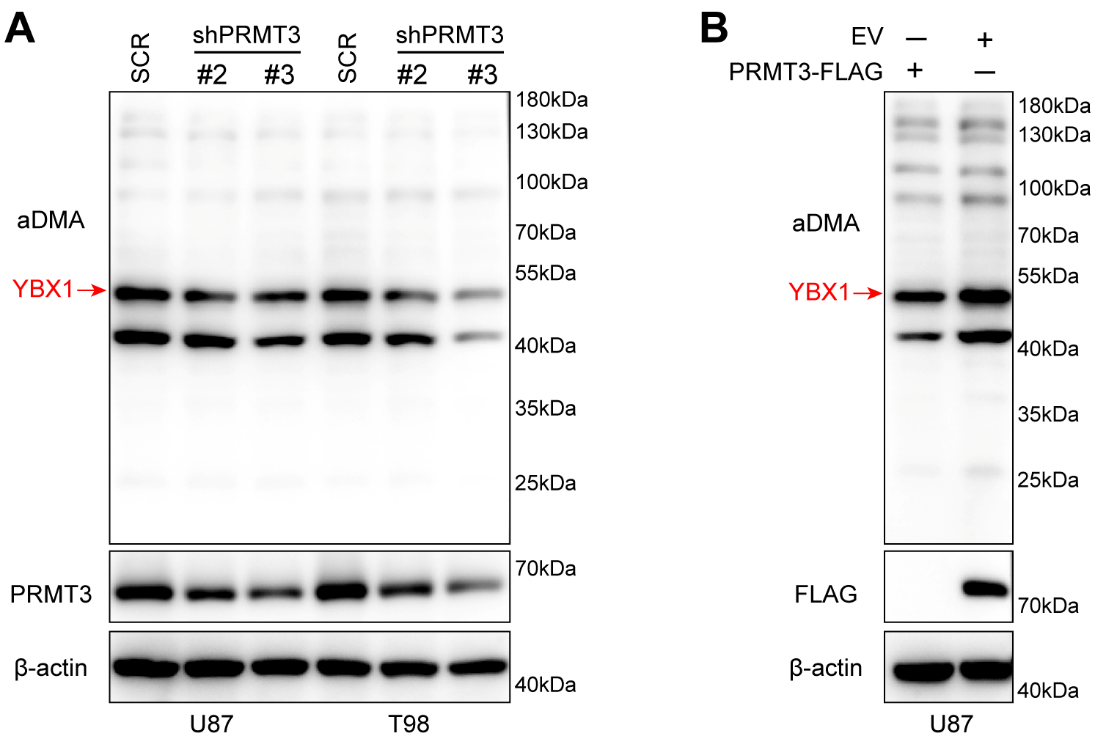


**Fig. S3 PRMT3 modulates global aDMA levels in GBM cells. A**, **B** Western blotting analysis of global aDMA levels in whole-cell lysates from U87 and T98 cells with PRMT3 knockdown (**A**) or U87 cells with PRMT3 overexpression (**B**).


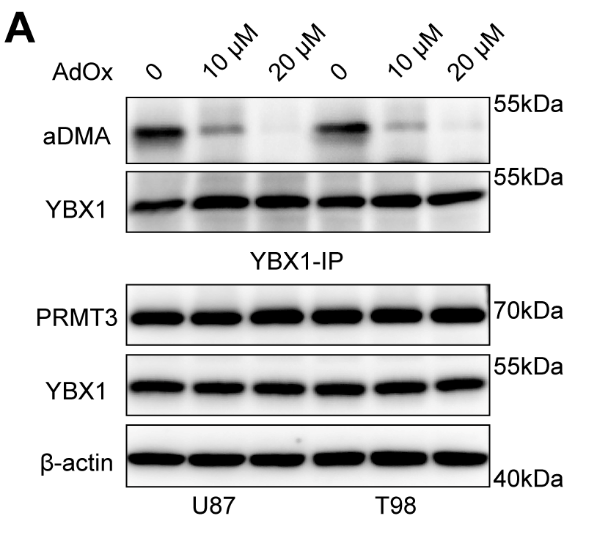


**Fig. S4 The pan-methyltransferase inhibitor AdOx abolishes YBX1 methylation. A** U87 and T98 cells were treated with the general methylation inhibitor AdOx (0 μM, 10 μM, 20 μM) for 48 hours. YBX1 was immunoprecipitated using an anti-YBX1 antibody, and the methylation status was assessed by western blotting with an anti-aDMA antibody.


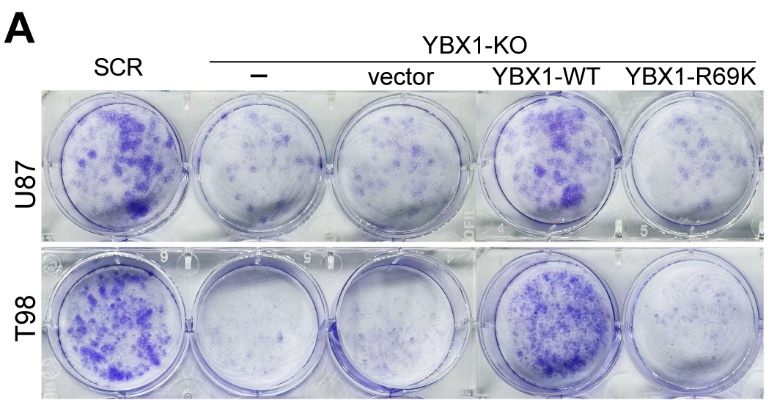


**Fig. S5 PRMT3-mediated asymmetric dimethylation of YBX1 at R69 is required for GBM cell proliferation. A** Representative images of colony formation in U87 and T98 YBX1‑KO cells reconstituted with vector control, YBX1‑WT or YBX1‑R69K.


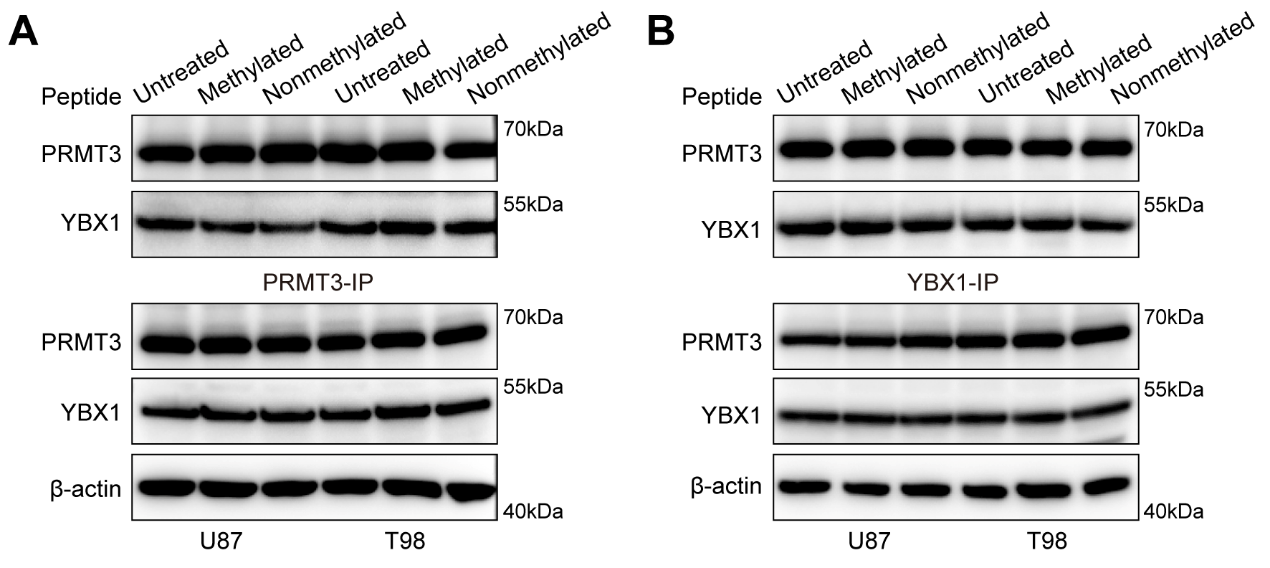


**Fig. S6 Effects of methylated or nonmethylated peptides on the PRMT3-YBX1 interaction. A**, **B** U87 and T98 cells were untreated or treated with methylated or non-methylated peptides as indicated. Co‑IP assay was performed using anti‑PRMT3 (**A**) or anti‑YBX1 (**B**) antibodies, followed by western blotting analysis of PRMT3 and YBX1 in the immunoprecipitates and input samples to assess changes in the PRMT3-YBX1 interaction upon peptide treatment.


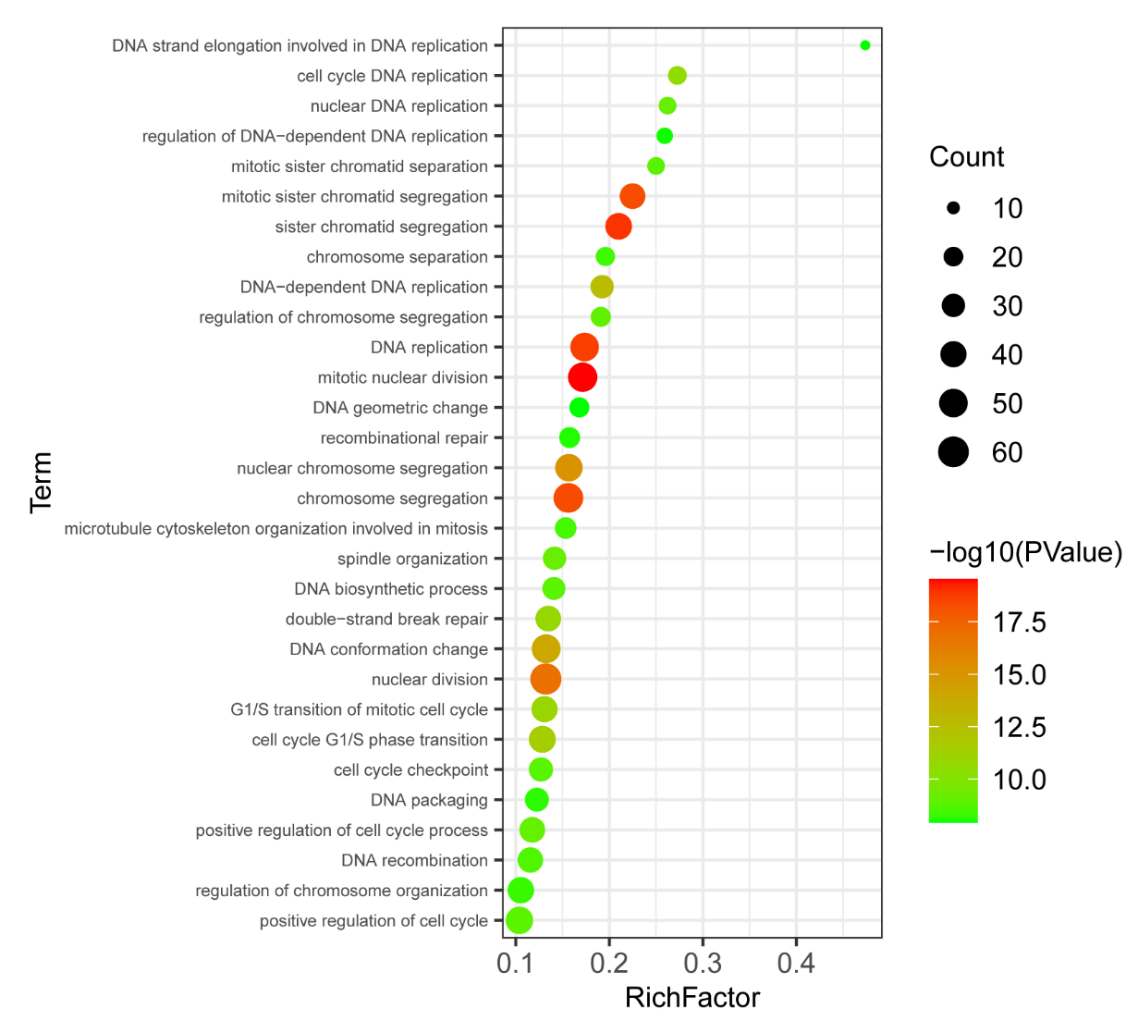


**Fig. S7 GO enrichment analysis of PRMT3-regulated genes in GBM cells. A** GO biological process analysis of differentially expressed genes (DEGs) derived from the GSE200902 dataset (PRMT3 knockdown vs. control). The dot plot displays the top 30 significantly enriched pathways (FDR < 0.05), ranked by gene count.


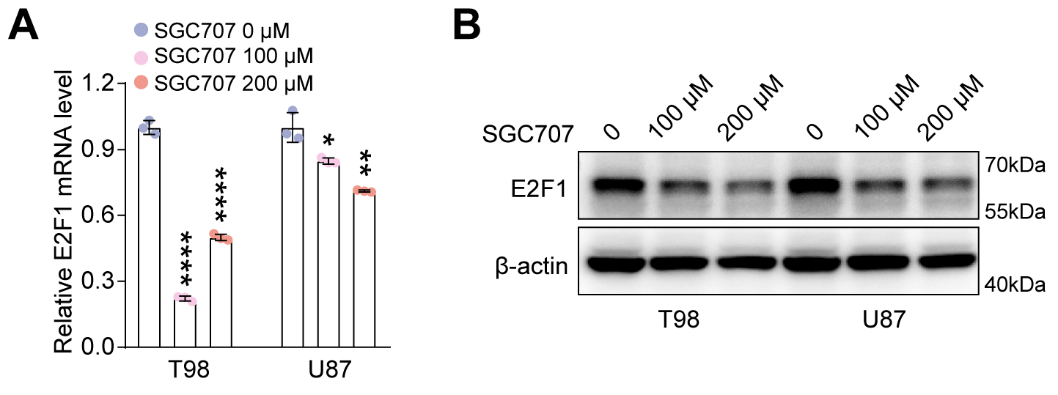


**Fig. S8 Pharmacological inhibition of PRMT3 by SGC707 suppresses E2F1 expression. A**, **B** T98 and U87 cells were treated with SGC707 for 48 hours. E2F1 mRNA levels were quantified by RT‑qPCR (**A**), and E2F1 protein levels were examined by western blotting (**B**). Data are presented as mean ± SD. **P* < 0.05, ***P* < 0.01, ****P* < 0.0001, versus the indicated groups, Student’s t-test.


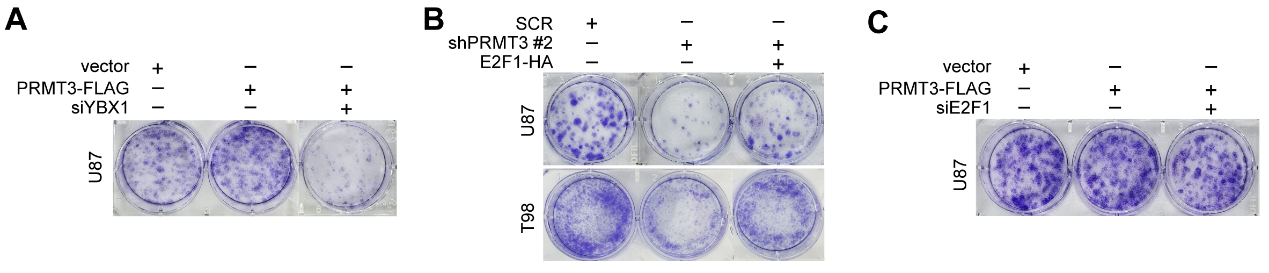


**Fig. S9 The effect of PRMT3-YBX1 on GBM cell proliferation is dependent on E2F1. A** Representative images of colony formation in U87 cells overexpressing PRMT3 with or without YBX1 knockdown. **B** Representative images of colony formation in U87 and T98 cells silencing PRMT3 with or without E2F1 overexpression. **C** Representative images of colony formation in U87 cells overexpressing PRMT3 with or without E2F1 knockdown.

**Table S1. Sequences of siRNAs and shRNAs.**

| shRNA/siRNA | Sequence (5'-3') |
| --- | --- |
| shRNA_NC | CCGGCAACAAGAT GAAGAGCACAACTCGAGTTGGTGCTCTTCATCTTGTTGTTTTT |
| shPRMT3 #1 | CCTTGGGAGAAAGAAGAGTATTTCAAGAGAATACTCTTCTTTCTCCCAAGG |
| shPRMT3 #2 | GATTCTGTCCTTTATGCAAAGTTCAAGAGACTTTGCATAAAGGACAGAATC |
| shPRMT3 #3 | GTTGAATAATTCAACTCAAACTTCAAGAGAGTTTGAGTTGAATTATTCAAC |
| siRNA_NC | UUCUCCGAACGUGUCACGUTT |
| siPRMT3 | GGUCACAGUUCACAAGAAUTT |
| siYBX1 #1 | GGAACGGAUAUGGUUUCAUTT |
| siYBX1 #2 | GCAGACCGUAACCAUUAUATT |
| YBX1 sgRNA | GTAATGGCTTTTGTAGGGTG |
| siE2F1 | CTACTCAGCCTGGAGCAAGAA |
| siNSUN2 | CACGTGTTCACTAAACCCTAT |

**Table S2. Primer sequences for RT-qPCR and RIP-qPCR.**

| Genes | Sequence (5'-3') |
| --- | --- |
| PRMT3 | F: CACTGTCTGCTGAAGCCGCATT |
| R: GTAGATGACGAGCAGGTTCTGAC |
| YBX1 | F: GGGGACAAGAAGGTCATCGC |
| R: CGAAGGTACTTCCTGGGGTTA |
| E2F1 | F: GGACCTGGAAACTGACCATCAG |
| R: CAGTGAGGTCTCATAGCGTGAC |
| NSUN2 | F: ACCTGGCTCAAAGACCACACAG |
| R: TGGCTTGATGGACGAGCAGGTA |
| β-actin | F: TCCTGTGGCATCCACGAAACT |
| R: GAAGCATTTGCGGTGGACGAT |
